# Supplementary material
Source: HighWire-hosted journal article supplement (doi:10.1101/rna.078261.120)
Supplement: Supplemental_Figure_Legend.docx [file Supplemental_Figure_Legend.docx]

**SUPPLEMENTAL FIGURE LEGENDS**

**Figure S1.** Internal promoter mutation or 5’ Alu sequence removal designed to abolish RLuc ORF production arising from trans-splicing. **a.** Schematic representation of trans-spliced products generated following transfection of circR/G.PGKwith circG/R.PGK (containing a deletion of the PGK promoter) leads to the production of a hybrid mRNA that encodes GFP, but cannot lead to RLuc ORF formation. **b.** Reconstitution of GFP ORF upon co-transfection of circG/R.PGK and circR/G5’Alu.PKG via trans-splicing. Due to space constraints, not all possible trans-splicing reactions are shown.
