# Supplementary material
Source: HighWire-hosted journal article supplement (doi:10.1101/rna.078261.120)
Supplement: Supplemental_Table_S1.xlsx [file Supplemental_Table_S1.xlsx]

## Sheet: Sheet1
	Table S1. Sequence of 5' leaders tested for IRES activity in circv1.
		Name	Sequence
		Scrb J/K Loop (EMCV IRES)	caattgccccctctccctcccccccccctaacgttactggccgaagccgcttggaataaggccggtgtgcgtttgtctatatgttattttccaccatattgccgtcttttggcaatgtgagggcccggaaacctggccctgtcttcttgacgagcattcctaggggtctttcccctctcgccaaaggaatgcaaggtctgttgaatgtcgtgaaggaagcagttcctctggaagcttcttgaagacaaacaacgtctgtagcgaccctttgcaggcagcggaaccccccacctggcgacaggtgcctctgcggccaaaagccacgtgtataagatacacctgcaaaggcggcacaaccccagtgccacgttgtgagttggatagttgtggaaagagtca…
		EMCV IRES	caattgccccctctccctcccccccccctaacgttactggccgaagccgcttggaataaggccggtgtgcgtttgtctatatgttattttccaccatattgccgtcttttggcaatgtgagggcccggaaacctggccctgtcttcttgacgagcattcctaggggtctttcccctctcgccaaaggaatgcaaggtctgttgaatgtcgtgaaggaagcagttcctctggaagcttcttgaagacaaacaacgtctgtagcgaccctttgcaggcagcggaaccccccacctggcgacaggtgcctctgcggccaaaagccacgtgtataagatacacctgcaaaggcggcacaaccccagtgccacgttgtgagttggatagttgtggaaagagtca…
		Polio IRES	caattgttaaaacagctctggggttgtacccaccccagaggcccacgtggcggctagtactccggtattgcggtacccttgtacgcctgttttatactcccttcccgtaacttagacgcacaaaaccaagttcaatagaagggggtacaaaccagtaccaccacgaacaagcacttctgtttccccggtgatgtcgtatagactgcttgcgtggttgaaagcgaccgatccgttatccgcttatgtacttcgagaagcccagtaccacctcggaatcttcgatgcgttgcgctcagcactcaaccccagagtgtagcttaggctgatgagtctggacatccctcaccggtgacggtggtccaggctgcgttggcggcctacctatggctaacgccatgg…
		HCV IRES	caattgtgggggcgacactccaccatagatcactcccctgtgaggaactactgtcttcacgcagaaagcgtctagccatggcgttagtatgagtgtcgtgcagcctccaggaccccccctcccgggagagccatagtggtctgcggaaccggtgagtacaccggaattgccaggacgaccgggtcctttcttggattaacccgctcaatgcctggagatttgggcgtgcccccgcgagactgctagccgagtagtgttgggtcgcgaaaggccttgtggtactgcctgatagggtgcttgcgagtgccccgggaggtctcgtagaccgtgcatcatgagcacaaatcctaaacctcaaaaaaaaaacaaacgtaacgctctagccaccacgcgtgccatg
		CrPV IRES	caattgaagctgactatgtgatcttattaaaattaggttaaatttcgaggttaaaaatagttttaatattgctatagtcttagaggtcttgtatatttatacttaccacacaagatggaccggagcagccctccaatatctagtgtaccctcgtgctcgctcaaacattaagtggtgttgtgcgaaaagaatctcacttcaagaaaaagaaatg
		c-Myc	caattgaattccagcgagaggcagagggagcgagcgggcggccggctagggtggaagagccgggcgagcagagctgcgctgcgggcgtcctgggaagggagatccggagcgaatagggggcttcgcctctggcccagccctcccgctgatcccccagccagcggtccgcaacccttgccgcatccacgaaactttgcccatagcagcgggcgggcactttgcactggaacttacaacacccgagcaaggacgcgactctcccgacgcggggaggctattctgcccatttggggacacttccccgccgctgccaggacccgcttctctgaaaggctctccttgcagctgcttagacgacgcgtgccatg
		ELG1	gcatagtaaccttgatcaattgaaaaacccatcacccctaaatgtattccaaagaataagaacattgttttatacatagcacacttaacaaaatcaagaaatttaacattaatacagtactgttacctaatccgtagtcgattttcaaattttgtcagttgttccaataatgtcctttatatattccccgcccagccgactcggaccgatggcttccaaggtgtacgaccccgagcaacgcaaacgcatgatcactgggcctcagtggtgggctcgctgcaagcaaatgaacgtgctggactccttcatcaactactatgattccgagaagcacgccgagaacgccgtgatttttctgcatggtaacgctgcctcctcctacctgtggaggcacgtcgt…
		ODC1	caattgctccatgggtccagccagccgcttccctgtgctgtgagtgtttccaccactccaggagacagcattcagagttgaccttgtgagagctggccataatttaattccatctctaggttttctgtcttattgtttcagaggcacatcgagaaccaaccatg
		c-Jun	caattggagttgcactgagtgtggctgaagcagcgaggcgggagtggaggtgcgcggagtcaggcagacagacagacacagccagccagccaggtcggcagtatagtccgaactgcaaatcttattttcttttcaccttctctctaactgcccagagctagcgcctgtggctcccgggctggtgtttcgggagtgtccagagagcctggtctccagccgcccccgggaggagagccctgctgcccaggcgctgttgacagcggcggaaagcagcggtacccacgcgcccgccgggggaagtcggcgagcggctgcagcagcaaagaactttcccggctgggaggaccggagacaagtggcagagtcccggagcgaacttttgcaagcctttcctgcgtc…
		CDK11	caattgcgcaaggagcgggaggcccgcagggaagtgtctgcacatcaccgaacgatgagagaggactacagcgacaaagtgaaagccagccactggagtcgcagcccgcctcggccgccgcgggagcggttcgagttgggagacggccggaagccagtaaaagaagagaaaatggaagaaagggacctgctgtccgacttacaggacatcagcgacagcgagaggaagaccagctcggccgagtcctcgtcagcggaatcaggctcaggttctgaggaagaagaggaggaggaggaagaggaggaggaggaagggagcaccagtgaagaatcagaggaggaggaggaggaagaggaagaggaggaggaggagaccggcagcaactctgaggaggcatca…
		FYB	caattggcatcagaaagctccgcagttcttgagttccacatgcagagcagatgcgacagctagaagtgagtagggcccagaccctggcccaggaagatccactaaaggaggccatccttccgccttcttctgcaggagtcaggatggaaaggcagatgtaaagtccctcatggcgaaataacgcgtgccatg
		HIST1H1C	caattgcatcggcgctttgccacttgtacccgagtttttgattctcaacatgtccgagactgctcctgccgctcccgctgccgcgcctcctgcggagaaggcccctgtaaagaagaaggcggccaaaaaggctgggggtacgcctcgtaaggcgtctggtcccccggtgtcagagctcatacgcgtgccatg
		SAT1	caattggctcttagtcgcgggccgactggtgtttatccgtcactcgccgaggttccttgggtcatggtgccagcctgactgagaagaggacgctcccgggagacgaatgaggaaccacctcctcctactgttcaagtacaggggcctggtccgcaaagggaagaaaagcaaaagacgaaaacgcgtgccatg
		ZNF611	caattggattaacgcaaacccggaagcggatcgggtggagtgtaggtcatatcgccgcgatatctcttccaaatgcttgatgaaaaaggtgggaggatcacttgagccagggagttgaaggctgcagtgagccctgtttttgccaccacactccagcttgggattgattcctaaagactcacgcgtgccatggtgagcaagggcgaggag
		PGK Promoter	caattgcattccacatccaccggtaggcgccaaccggctccgttctttggtggccccttcgcgccaccttctactcctcccctagtcaggaagttcccccccgccccgcagctcgcgtcgtgcaggacgtgacaaatggaagtagcacgtctcactagtctcgtgcagatggacagcaccgctgagcaatggaagcgggtaggcctttggggcagcggccaatagcagctttgctccttcgctttctgggctcagaggctgggaaggggtgggtccgggggcgggctcaggggcgggctcaggggcggggcgggcgcccgaaggtcctccggaggcccggcattctgcacgcttcaaaagcgcacgtctgccgcgctgttctcctcttcctcatctccg…
